# Supplementary material for: Foreign Risk, Domestic Problem: Capital Allocation and Firm Performance Under Political Instability
Source: Atypon-hosted journal article supplement (doi:10.1287/mnsc.2016.2638), 2017-01-31
Supplement: mnsc.2016.2638-sm.pdf [file mnsc.2016.2638-sm.pdf]

**FOREIGN RISK – DOMESTIC PROBLEM:  
CAPITAL ALLOCATION AND FIRM PERFORMANCE  
UNDER POLITICAL INSTABILITY\***

Burcin Col  
Pace University

Artem Durnev  
University of Iowa

Alexander Molchanov  
Massey University

**SUPPLEMENTARY APPENDIXES**

---

\* Art Durnev, Henrie B. Tippie College of Business, University of Iowa, Iowa City, IA, 52242, U.S. E-mail: artem-durnev@uiowa.edu.

Burcin Col, Lubin School of Business, Pace University, New York, NY, 10038, U.S. E-mail: bcol@pace.edu.

Alexander Molchanov, School of Economics and Finance, Massey University, Private Bag 102 904, North Shore MSC, Auckland, New Zealand. E-mail: a.e.molchanov@massey.ac.nz.

## Appendix A: Proofs.

This Appendix lists mathematical proofs.

The  $\dot{q}_{t+1} - \dot{q}_t = 0$  isocline slopes downward.

This follows from the fact that  $\frac{\partial \dot{q}_t}{\partial K_t} < 0$ . To show this, multiply both sides of (9) by  $1 + r$  and note that, in equilibrium,

$\dot{q}_t = \dot{q}_{t+1}$ . Then,

$$\dot{q}_t = \frac{1}{1+r} E_t \left[ A_{t+1} F'_K(K_{t+1}, N_{t+1}) + \frac{b}{2} \left( \frac{I_{t+1}}{K_{t+1}} \right)^2 + \dot{q}_{t+1} \right], \quad (\text{A1})$$

$$\dot{q}_t = \left( \frac{1}{r} \right) \left( E_t A_{t+1} F'_K(K_{t+1}, N_{t+1}) + \frac{b}{2} \left( \frac{I_{t+j}}{K_{t+j}} \right)^2 \right), \quad (\text{A2})$$

$$\frac{\partial \dot{q}_t}{\partial K_t} = \left( \frac{1}{r} \right) \left( E_t A_{t+1} F'_{KK}(K_{t+1}, N_{t+1}) - \frac{b}{2} \left( \frac{I_{t+j}}{K_{t+j}} \right)^3 \right) < 0. \quad (\text{A3})$$

**Q.E.D.**

**Proof of Proposition 1:** Marginal  $q$  in period  $e$  is,

$$\dot{q}_e = E_e \sum_{j=1}^{\infty} \left( \frac{1}{1+r} \right)^j \left( A_{e+j} F'_K(K_{e+j}, N_{e+j})(1-ug) + \frac{1}{b} \left( \frac{I_{e+j}}{K_{e+j}} \right)^2 \right). \quad (\text{A4})$$

Marginal  $q$  in election period  $e$  is a decreasing function of instability  $u$  for  $g > 0$  (worse business environment) and an increasing function of  $u$  for  $g < 0$  (better business environment),

$$\frac{\partial \dot{q}_e}{\partial u} = E_e \sum_{j=1}^{\infty} \left( \frac{1}{1+r} \right)^j \left( -g A_{e+j} F'_K(K_{e+j}, N_{e+j}) + \frac{1}{b} \left( \frac{I_{e+j}}{K_{e+j}} \right)^2 \right) < 0. \quad (\text{A5})$$

Moreover,

$$\frac{\partial \dot{q}_e}{\partial u \partial g} = E_e \sum_{j=1}^{\infty} \left( \frac{1}{1+r} \right)^j \left( -A_{e+j} F'_K(K_{e+j}, N_{e+j}) + \frac{1}{b} \left( \frac{I_{e+j}}{K_{e+j}} \right)^2 \right) < 0. \quad (\text{A6})$$

According to (A6), for  $g > 0$ , investment in period  $e$  would decrease, and capital stock would decrease because  $I_e / K_e < 0$  if  $\dot{q}_e < 1$ . The reverse is true for  $g < 0$  because  $I_e / K_e > 0$  if  $\dot{q}_e > 1$ .

**Q.E.D.**

**Proof of Proposition 2:** To prove it, we first need to derive the envelope theorem for Lagrangian. Using the notations for our model, consider a general problem

$$V = \max F(K, N, u), \quad (\text{A7})$$

subject to

$$h(K, N, u) = 0. \quad (\text{A8})$$

We show that the derivative of equilibrium value at optimal parameter values  $K^*$  and  $N^*$  is just a partial derivative of Lagrangian, that is,

$$\frac{dV}{du} = \frac{\partial L(K^*(u), N^*(u), u)}{\partial u} = \frac{\partial F(K^*(u), N^*(u), u)}{\partial u} - \dot{q} \frac{\partial h(K^*(u), N^*(u), u)}{\partial u}. \quad (\text{A9})$$

We define Lagrangian as

$$L = F(K, N, u) - \dot{q} h(K, N, u). \quad (\text{A10})$$

The first-order conditions are

$$\frac{\partial F}{\partial K} - \dot{q} \frac{\partial h}{\partial K} = 0, \quad (\text{A11})$$

$$\frac{\partial F}{\partial N} - \dot{q} \frac{\partial h}{\partial N} = 0. \quad (\text{A12})$$

Then

$$\frac{dV}{du} = \frac{\partial F}{\partial K} \frac{dK}{du} + \frac{\partial F}{\partial N} \frac{dN}{du} + \frac{dF}{du} \quad \text{and} \quad (\text{A13})$$

$$\frac{dV}{du} = \dot{q} \left( \frac{dh}{dK} \frac{dK}{du} + \frac{dh}{dN} \frac{dN}{du} \right) + \frac{dF}{du}. \quad (\text{A14})$$

Note that

$$h(K^*(u), N^*(u), u) = 0. \quad (\text{A15})$$

Then

$$\frac{\partial h}{\partial K} \frac{\partial K}{\partial u} + \frac{\partial h}{\partial N} \frac{\partial N}{\partial u} + \frac{\partial h}{\partial u} = 0, \quad (\text{A16})$$

$$\frac{dV}{du} = -\dot{q} \frac{\partial h}{\partial u} + \frac{\partial F}{\partial u} = \frac{\partial L(K^*(u), N^*(u), u)}{\partial u}. \quad (\text{A17})$$

For the case of  $g > 0$ , we can use the envelope theorem and show that

$$\frac{dV_e}{du} = \frac{\partial L(K^*(u), N^*(u), u)}{\partial u} = -gA_e F(K_e, N_e) < 0. \quad (\text{A18})$$

We defined TFP as  $TFP_t = Y_t / F(K_t, N_t)$ . It follows that since, in period  $e$ , output drops from  $AF$  to  $AF(1 - gu)$ ,  $TFP_e = A(1 - ug)$ , which is lower than  $A$ . Since the policy shock improves output, TFP in period  $e$ ,  $A(1 - ug)$ , is larger for  $g < 0$ .

**Q.E.D.**

## Appendix B: Marginal $q$ and Non-Linear Estimation of Optimal Level.

### B1. Marginal $q$

Durnev et al. (2004) show that marginal  $q$  is the estimate of marginal project's profitability index. Due to declining marginal returns on investment, capital is invested till the incremental value of a project is equal to its cost, implying an optimal level of marginal  $q$  equal to 1. Durnev et al. (2004) define marginal  $q$  (denoted as  $\hat{q}$ ) as the ratio of the change in the market value of a firm  $V$  due to an unexpected unit increase in its stock of capital goods  $K$ , which equals the expectation of profitability index,

$$\hat{q} = \frac{\Delta V}{\Delta K} = \frac{1}{C} E \left[ \sum_{t=1}^{\infty} \frac{cf_t}{(1+r)^t} \right] = 1 + \frac{E[NPV]}{C} = E[PI] \quad . \quad (B1)$$

In (B1), all capital spending is aggregated into a project with the set-up cost  $C$ ,  $cf$  is total cash flow,  $r$  is the discount rate, and  $E$  represents investor expectations. It is optimal to invest in projects with positive  $NPV$ , that is, when profitability index  $PI$  is greater than 1. Therefore, ignoring taxes and other complications, firms invest up to the point when marginal  $q$  equals 1. Thus, the greater the distance between marginal  $q$  and 1, the worse the quality of capital allocation is, and marginal  $q$  greater (lower) than 1 indicates under-investment (over-investment).

Marginal  $q$  can be expressed as

$$\hat{q}_{j,t} = \frac{V_{j,t} - V_{j,t-1}(1 + \hat{r}_{j,t} - \hat{d}_{j,t})}{A_{j,t} - A_{j,t-1}(1 + \hat{g}_{j,t} - \hat{\delta}_{j,t})} \quad , \quad (B2)$$

where  $V_{j,t}$  and  $A_{j,t}$  are the market value and stock of capital goods of firm  $j$  in period  $t$ , and  $\hat{r}_{j,t}$  is the expected return from owning firm  $j$ . Variables  $\hat{d}_{j,t}$  and  $\hat{\delta}_{j,t}$  represent disbursements to investors and expected depreciation of capital goods, respectively. Rewriting (B2) and normalizing by  $A_{j,t-1}$  we obtain

$$\frac{V_{j,t}^i - V_{j,t-1}^i}{A_{j,t-1}^i} = -\hat{q}_{j,t}(g_{j,t} - \delta_{j,t}) + \hat{q}_{j,t} \frac{A_{j,t}^i - A_{j,t-1}^i}{A_{j,t-1}^i} - \xi_{j,t} \frac{D_{j,t-1}^i}{A_{j,t-1}^i} + r_{j,t} \frac{V_{j,t-1}^i}{A_{j,t-1}^i} \quad , \quad (B3)$$

where  $i$  denotes industries a firm  $j$  belongs to. We estimate  $V_{j,t}$  and  $A_{j,t}$  for firm  $j$  in period  $t$  as:

$$V_{j,t} = P_t(CS_{j,t} + PS_{j,t} + LTD_{j,t} + SD_{j,t} - STA_{j,t}) \quad (B4)$$

$$A_{j,t} = K_{j,t} + INV_{j,t} \quad , \quad (B5)$$

where  $CS$  is the market value of shares outstanding;  $PS$  is the estimated market value of preferred shares;  $LTD$  is the estimated market value of long-term debt;  $SD$  is the book value of short-term debt;  $STA$  is the book value of short-term assets;  $P$  is inflation adjustment using the GDP deflator;  $K$  is the estimated value of plant, property, and equipment; and  $INV$  is the estimated market value of inventories. The market value of long-term debt is estimated as the value of a 15-year bond issued at par using book values of debt. The stock of capital goods is estimated recursively in (B5) using the market value of inventories and data on property, plant, and equipment assuming 10% depreciation rate. We refer to Appendix A in Durnev et al. (2004) for further details. Variable  $D$  in (B3) is dividends for common shares plus repurchases of common shares plus interest expenses. Variables  $V$  and  $A$  are winsorized at 1% and 99% levels.

### B2. Non-Linear Estimation of Optimal Level for Marginal $q$

We relax the assumption of the optimal level  $h$  being equal to 1 and estimate

$$|\hat{q}_i - h| = b'Z_i + u_i \quad , \quad (B6)$$

where  $Z_i$  represents the list of independent variables. Using non-linear least squares, the optimal level  $h$  and regression coefficients are estimated simultaneously. Equation (B6) is equivalent to

$$\hat{q}_i^2 = -h^2 + 2h\hat{q}_i + (b'Z_i + u_i)^2 \quad . \quad (B7)$$

In the nonlinear least squares estimation, the following function is minimized with respect to  $b$ :

$$Q_i(b) = \frac{1}{I} \sum_{i=1}^I [y_i - f(x_i; b)]^2 \quad , \quad (B8)$$

where  $y_i = \hat{q}_i^2$  and  $f(x_i; b) = -h^2 + 2h\hat{q}_i + (b'Z_i)^2$ .

## Appendix C: Election Data.

**Table C1: Political System, Party Orientation, and Elections.**

This table lists the type of a political system (presidential or parliamentary), the chief executive's party orientation during the sample period (left, right, or center), and years of the elections of the chief executive based on the World Bank Database of Political Institutions. We cross-check the election data with data reported by International Institute for Democracy and Electoral Assistance, Center on Democratic Performance, Journal of Democracy, Elections around the World, Election Guide, The CIA World Factbook, the PARLINE Database on National Parliaments, and Keesing's Record of World Events. The political system is classified as presidential when (i) the chief executive is not elected or (ii) presidents are elected directly or by an electoral college in the event there is no prime minister. In systems with both a prime minister and a president, exact classification depends on the veto power of the president and the power of the president to appoint a prime minister and dissolve parliament. Systems in which the legislature elects the chief executive are classified as parliamentary. Election year is the year of presidential election for presidential systems and of parliamentary elections for parliamentary systems. Party orientation is determined according to the party of chief executive using the following rule: right for parties that are defined as conservative, Christian-Democratic, or right-wing; left for parties that are defined as communist, socialist, social-democratic, or left-wing; center for parties that can be best described as centrist. "NA" appears for cases when the exact party orientation cannot be determined. Refer to Beck et al. (2010) for further details. The sample beginning years for every country correspond to the availability of return series. Notes: \*Pakistan had a parliamentary system until 1999. In 1999, the system changed to presidential after a military coup d'état.

| Country     | System        | Party type  | Year | Country    | System        | Party type   | Year | Country      | System        | Party type   | Year |
|-------------|---------------|-------------|------|------------|---------------|--------------|------|--------------|---------------|--------------|------|
| Argentina   | Presidential  | 1997-1999:R | -    | Chile      | Presidential  | 1997-2000:R  | -    | France       | Parliamentary | 1997:R       | -    |
|             |               | 2000-2001:C | 1999 |            |               | 2001-2005:R  | 2000 |              |               | 1998-2002:L  | 1997 |
|             |               | 2002-2003:R | -    |            |               | 2006-2006:R  | 2005 |              |               | 2003-2006:R  | 2002 |
| Australia   | Parliamentary | 2004-2006:L | 2003 | China      | NA            | 1997-2006:L  | -    | Germany      | Parliamentary | 1997-1998:R  | -    |
|             |               | 1997-1998:R | -    | Colombia   | Presidential  | 1997-1998:C  | -    |              |               | 1999-2002:L  | 1998 |
|             |               | 1999-2001:R | 1998 |            |               | 1999-2002:R  | 1998 | 2003-2005:L  | 2002          |              |      |
|             |               | 2002-2004:R | 2001 |            |               | 2003-2006:NA | 2002 | 2006-2006:R  | 2005          |              |      |
| Austria     | Parliamentary | 2005-2006:R | 2004 | Czech Rep. | Parliamentary | 1997-1998:R  | -    | Greece       | Parliamentary | 1997-2000:L  | -    |
|             |               | 1997-1999:L | -    |            |               | 1999-2002:L  | 1998 |              |               | 2001-2004:L  | 2000 |
|             |               | 2000-2002:R | 1999 |            |               | 2003-2006:L  | 2002 | 2005-2006:R  | 2004          |              |      |
| Belgium     | Parliamentary | 2003-2006:R | 2002 | Denmark    | Parliamentary | 1997-1998:L  | -    | Hungary      | Parliamentary | 1997-1998:R  | -    |
|             |               | 1997-1999:R | -    |            |               | 1999-2001:L  | 1998 |              |               | 1999-2002:L  | 1998 |
|             |               | 2000-2003:R | 1999 |            |               | 2002-2005:R  | 2001 | 2003-2006:L  | 2002          |              |      |
| Brazil      | Presidential  | 2004-2006:R | 2003 |            |               | 2006-2006:R  | 2005 | India        | Parliamentary | 1997-1999:L  | 1998 |
|             |               | 1997-1998:L | -    | Egypt      | Parliamentary | 1997-2000:NA | -    |              |               | 2000-2004:R  | 1999 |
|             |               | 1999-2002:L | 1998 |            |               | 2001-2005:NA | 2000 | 2005-2006:L  | 2004          |              |      |
| Canada      | Parliamentary | 2003-2006:L | 2002 |            |               | 2006-2006:NA | 2005 | Indonesia    | Parliamentary | 1997:NA      | 1997 |
|             |               | 1997:L      | -    | Finland    | Parliamentary | 1997-1999:L  | 1995 |              |               | 1998-1999:NA | 1999 |
|             |               | 1998-2000:L | 1997 |            |               | 2000-2003:L  | 1999 | 2000-2004:NA | 2004          |              |      |
|             |               | 2001-2004:L | 2000 |            |               | 2004-2006:C  | 2003 | Ireland      | Parliamentary | 1997:R       | -    |
| 2005-2006:L | 2004          |             |      |            |               | 1998-2002:C  | 1997 |              |               |              |      |
|             |               |             |      |            |               |              |      | 2003-2006:C  | 2002          |              |      |

**Table C1 continued.**

| Country     | System        | Party type   | Year | Country      | System         | Party type    | Year | Country     | System        | Party type   | Year |
|-------------|---------------|--------------|------|--------------|----------------|---------------|------|-------------|---------------|--------------|------|
| Israel      | Parliamentary | 1997-1999:R  | -    | Pakistan     | Parliamentary* | 1997:L        | -    | Sri Lanka   | Presidential  | 1997-1999:L  | -    |
|             |               | 2000-2001:R  | 1999 |              |                | 1998-2006:NA  | 1997 |             |               | 2000-2005:L  | 1999 |
|             |               | 2002-2006:R  | 2001 |              |                | 1997-2000:R   | -    |             |               | 2006-2006:NA | 2005 |
| Italy       | Parliamentary | 1997-2001:C  | -    | Peru         | Presidential   | 2001-2001:R   | 2000 | Sweden      | Parliamentary | 1997-1998:L  | -    |
|             |               | 2002-2006:R  | 2001 |              |                | 2002-2006:C   | 2001 |             |               | 1999-2002:L  | 1998 |
| Japan       | Parliamentary | 1997-2000:R  | -    | Philippines  | Presidential   | 1997-1998:C   | -    | Switzerland | Parliamentary | 2003-2006:L  | 2002 |
|             |               | 2001-2003:R  | 2000 |              |                | 1999-2004:C   | 1998 |             |               | 1997-1999:NA | -    |
|             |               | 2004-2005:R  | 2003 |              |                | 2005-2006:C   | 2004 |             |               | 2000-2003:NA | 1999 |
| Luxembourg  | Parliamentary | 1997-1999:C  | -    | Poland       | Parliamentary  | 1997: NA      | -    | Taiwan      | Parliamentary | 2004-2006:NA | 2003 |
|             |               | 2000-2004:C  | 1999 |              |                | 1998-2001: NA | 1997 |             |               | 1997-2000:R  | -    |
|             |               | 2005-2006:C  | 2004 |              |                | 2002-2004: NA | 2001 |             |               | 2001-2004:R  | 2000 |
| Malaysia    | Parliamentary | 1997-1999:NA | -    | Portugal     | Parliamentary  | 2005-2006: NA | 2005 | Thailand    | Parliamentary | 2005-2006:R  | 2004 |
|             |               | 2000-2004:NA | 1999 |              |                | 1997-1999:L   | -    |             |               | 1997-2001:R  | -    |
|             |               | 2005-2006:NA | 2004 |              |                | 2000-2002:L   | 1999 |             |               | 2002-2005:NA | 2001 |
| Mexico      | Presidential  | 1997:L       | -    | Russia       | Presidential   | 2003-2005:R   | 2002 | Turkey      | Parliamentary | 2006-2006:NA | 2005 |
|             |               | 1998-2000:L  | 1997 |              |                | 2006-2006:L   | 2005 |             |               | 1997-1999:R  | -    |
|             |               | 2001-2006:R  | 2000 |              |                | 1997-2000:NA  | -    |             |               | 2000-2002:L  | 1999 |
| Morocco     | NA            | 1997-2006:NA | -    |              |                | 2001-2004:NA  | 2000 |             |               | 2003-2006:NA | 2002 |
| Netherlands | Parliamentary | 1997-1998:L  | -    | Singapore    | Parliamentary  | 2005-2006:NA  | 2004 | UK          | Parliamentary | 1997:R       | -    |
|             |               | 1999-2002:L  | 1998 |              |                | 1997:NA       | -    |             |               | 1998-2001:L  | 1997 |
|             |               | 2003-2003:L  | 2002 |              |                | 1998-2001:NA  | 1997 |             |               | 2002-2005:L  | 2001 |
|             |               | 2004-2006:R  | 2003 |              |                | 2002-2006:NA  | 2001 |             |               | 2006-2006:L  | 2005 |
| New Zealand | Parliamentary | 1997-1999:R  | -    | South Africa | Parliamentary  | 1997-1999:L   | -    | U.S.        | Presidential  | 1997-2000:L  | -    |
|             |               | 2000-2002:L  | 1999 |              |                | 2000-2004:L   | 1999 |             |               | 2001-2004:R  | 2000 |
|             |               | 2003-2005:L  | 2002 |              |                | 2005-2006:L   | 2004 |             |               | 2005-2006:R  | 2004 |
|             |               | 2006-2006:L  | 2005 |              |                | 1997-2000:C   | -    |             |               | 1997-1998:NA | -    |
| Norway      | Parliamentary | 1997:L       | -    | South Korea  | Presidential   | 2001-2006:C   | 2000 | Venezuela   | Presidential  | 1999-2000:NA | 1998 |
|             |               | 1998-2001:R  | 1997 |              |                | 1997-2000:R   | 2000 |             |               | 2001-2006:NA | 2000 |
|             |               | 2002-2005:R  | 2001 |              |                | 2001-2004:R   | 2004 |             |               | 1997-2000:NA | -    |
|             |               | 2006-2006:L  | 2005 |              |                | 2005-2006:L   | -    |             |               | 2001-2006:NA | 2002 |
|             |               |              |      | Spain        | Parliamentary  |               |      | Zimbabwe    | Presidential  |              |      |

**Table C2: Classification of Electoral Timing.**

This table presents the classification of elections according to electoral timing. The countries are classified as having flexible electoral timing if the national leader or legislative body has the option to call an election before the regularly scheduled date. An election is classified as ‘called’ if it took place more than three months before the regularly scheduled date. A variety of additional data sources was consulted, such as International Institute for Democracy and Electoral Assistance, Center on Democratic Performance, Journal of Democracy, Elections around the World, Election Guide, The CIA World Factbook, the PARLINE Database on National Parliaments, and Keesing’s Record of World Events. Notes: \* 1999 Indonesian election is classified as ‘called’ even though Indonesia is classified as having fixed election timing. It was an irregular election following the fall of Suharto administration; \*\* the 2001 Peruvian election is classified as ‘called’ as it was an irregular election following the fall of Fujimori administration.

| Country   | Election | electoral timing | Called election | Country    | Election | Electoral timing | Called election | Country     | Election | Electoral timing | Called election |
|-----------|----------|------------------|-----------------|------------|----------|------------------|-----------------|-------------|----------|------------------|-----------------|
| Argentina | 1999     | Fixed            | No              | Finland    | 1999     | Flexible         | No              | Luxembourg  | 2004     | Fixed            | No              |
| Argentina | 2003     | Fixed            | No              | Finland    | 2003     | Flexible         | No              | Malaysia    | 1999     | Flexible         | Yes             |
| Australia | 1998     | Flexible         | Yes             | France     | 1997     | Fixed            | No              | Malaysia    | 2004     | Flexible         | No              |
| Australia | 2001     | Flexible         | No              | France     | 2002     | Fixed            | No              | Mexico      | 1997     | Fixed            | No              |
| Australia | 2004     | Flexible         | No              | Germany    | 1998     | Flexible         | No              | Mexico      | 2000     | Fixed            | No              |
| Austria   | 1999     | Flexible         | No              | Germany    | 2002     | Flexible         | No              | Netherlands | 1998     | Flexible         | No              |
| Austria   | 2002     | Flexible         | Yes             | Germany    | 2005     | Flexible         | Yes             | Netherlands | 2002     | Flexible         | No              |
| Belgium   | 1999     | Flexible         | Yes             | Greece     | 2000     | Flexible         | Yes             | Netherlands | 2003     | Flexible         | Yes             |
| Belgium   | 2003     | Flexible         | No              | Greece     | 2004     | Flexible         | No              | New Zealand | 1999     | Flexible         | No              |
| Brazil    | 1998     | Fixed            | No              | Hungary    | 1998     | Fixed            | No              | New Zealand | 2002     | Flexible         | No              |
| Brazil    | 2002     | Fixed            | No              | Hungary    | 2002     | Fixed            | No              | New Zealand | 2005     | Flexible         | No              |
| Canada    | 1997     | Flexible         | Yes             | India      | 1998     | Flexible         | Yes             | Norway      | 1997     | Fixed            | No              |
| Canada    | 2000     | Flexible         | Yes             | India      | 1999     | Flexible         | Yes             | Norway      | 2001     | Fixed            | No              |
| Canada    | 2004     | Flexible         | Yes             | India      | 2004     | Flexible         | Yes             | Norway      | 2005     | Fixed            | No              |
| Chile     | 2000     | Fixed            | No              | Indonesia  | 1997     | Fixed            | No              | Pakistan    | 1997     | Flexible         | Yes             |
| Chile     | 2005     | Fixed            | No              | Indonesia* | 1999     | Fixed            | Yes             | Peru        | 1995     | Fixed            | No              |
| Colombia  | 1998     | Fixed            | No              | Indonesia  | 2004     | Fixed            | No              | Peru        | 2000     | Fixed            | No              |
| Colombia  | 2002     | Fixed            | No              | Ireland    | 1997     | Flexible         | Yes             | Peru**      | 2001     | Fixed            | Yes             |
| Czech Rep | 1998     | Flexible         | No              | Ireland    | 2002     | Flexible         | No              | Philippines | 1998     | Fixed            | No              |
| Czech Rep | 2002     | Flexible         | No              | Israel     | 1999     | Flexible         | Yes             | Philippines | 2004     | Fixed            | No              |
| Denmark   | 1998     | Flexible         | No              | Israel     | 2001     | Flexible         | Yes             | Poland      | 1997     | Flexible         | No              |
| Denmark   | 2001     | Flexible         | Yes             | Italy      | 2001     | Flexible         | No              | Poland      | 2001     | Flexible         | No              |
| Denmark   | 2005     | Flexible         | Yes             | Japan      | 2000     | Flexible         | Yes             | Poland      | 2005     | Flexible         | No              |
| Egypt     | 2000     | Fixed            | No              | Japan      | 2003     | Flexible         | Yes             | Portugal    | 1999     | Flexible         | No              |
| Egypt     | 2005     | Fixed            | No              | Luxembourg | 1999     | Fixed            | No              | Portugal    | 2002     | Flexible         | Yes             |

**Table C2 continued.**

| <b>Country</b> | <b>Election</b> | <b>Electoral timing</b> | <b>Called election</b> | <b>Country</b> | <b>Election</b> | <b>Electoral timing</b> | <b>Called election</b> |
|----------------|-----------------|-------------------------|------------------------|----------------|-----------------|-------------------------|------------------------|
| Portugal       | 2005            | Flexible                | Yes                    | Switzerland    | 2003            | Fixed                   | No                     |
| Russia         | 2000            | Fixed                   | No                     | Taiwan         | 2000            | Fixed                   | No                     |
| Russia         | 2004            | Fixed                   | No                     | Taiwan         | 2004            | Fixed                   | No                     |
| Singapore      | 1997            | Flexible                | No                     | Thailand       | 2001            | Flexible                | No                     |
| Singapore      | 2001            | Flexible                | Yes                    | Thailand       | 2005            | Flexible                | No                     |
| S. Africa      | 1999            | Flexible                | No                     | Turkey         | 1999            | Flexible                | Yes                    |
| S. Africa      | 2004            | Flexible                | No                     | Turkey         | 2002            | Flexible                | Yes                    |
| S. Korea       | 2000            | Fixed                   | No                     | UK             | 1997            | Flexible                | No                     |
| Spain          | 2000            | Flexible                | No                     | UK             | 2001            | Flexible                | Yes                    |
| Spain          | 2004            | Flexible                | No                     | UK             | 2005            | Flexible                | Yes                    |
| Sri Lanka      | 1999            | Flexible                | Yes                    | U.S.           | 2000            | Fixed                   | No                     |
| Sri Lanka      | 2005            | Flexible                | No                     | U.S.           | 2004            | Fixed                   | No                     |
| Sweden         | 1998            | Fixed                   | No                     | Venezuela      | 1998            | Fixed                   | No                     |
| Sweden         | 2002            | Fixed                   | No                     | Venezuela      | 2000            | Fixed                   | No                     |
| Switzerland    | 1999            | Fixed                   | No                     | Zimbabwe       | 2002            | Fixed                   | No                     |
